# Supplementary material for: Transcriptomic analyses of the radiation response in head and neck squamous cell carcinoma subclones with different radiation sensitivity: time-course gene expression profiles and gene association networks
Source: Springer Nature journal article supplement (doi:10.1186/s13014-016-0672-0), 2016-07-26

(A)

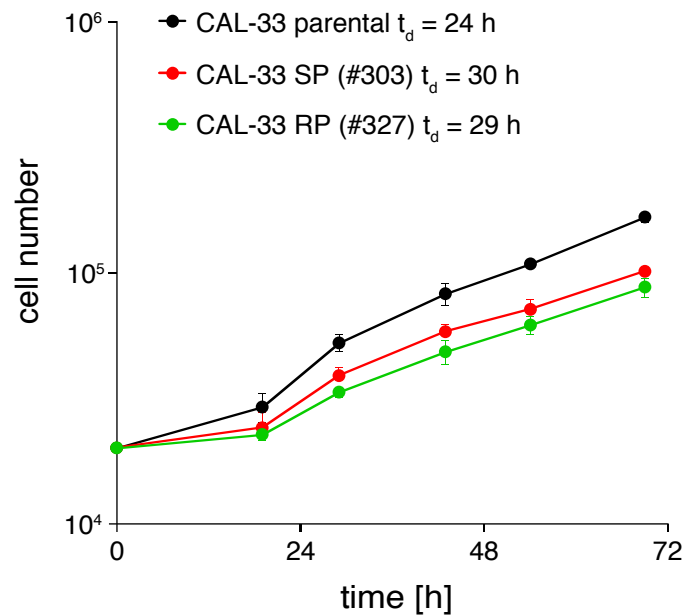

(B)

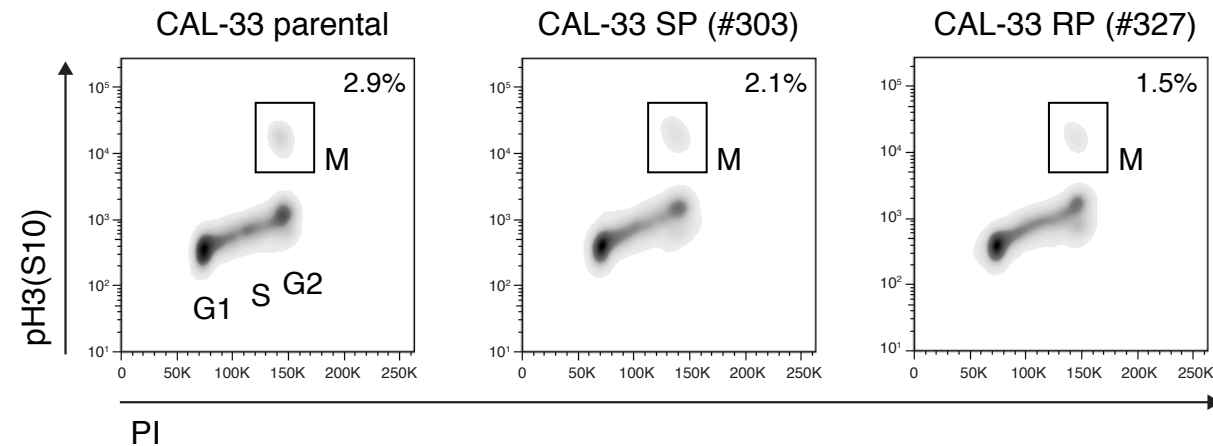

(C)

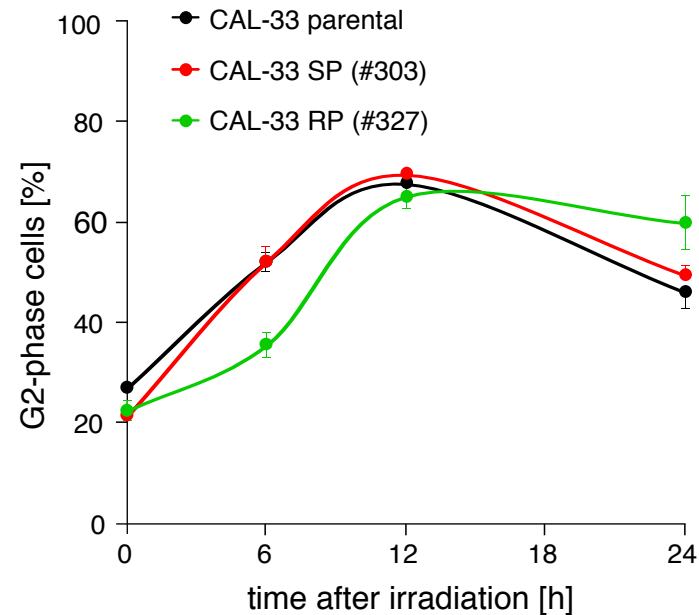

Supplement: MOESM3 [file 10521202]
