# Supplementary material for: Transcriptomic analyses of the radiation response in head and neck squamous cell carcinoma subclones with different radiation sensitivity: time-course gene expression profiles and gene association networks
Source: Springer Nature journal article supplement (doi:10.1186/s13014-016-0672-0), 2016-07-26

CAL-33 parental

ERVMER34-1

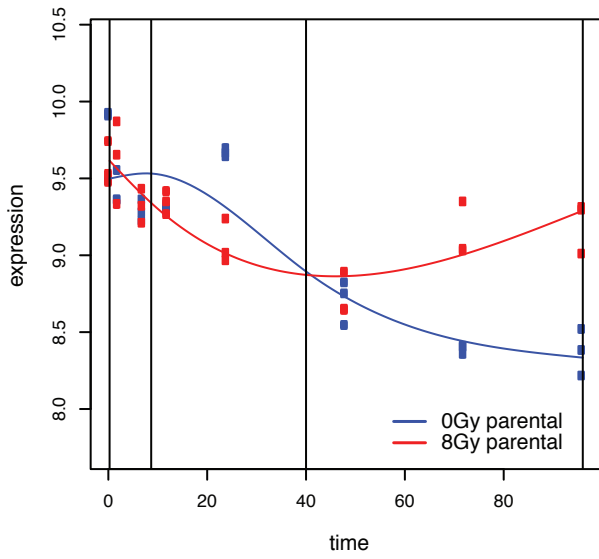

ERVMER34-1

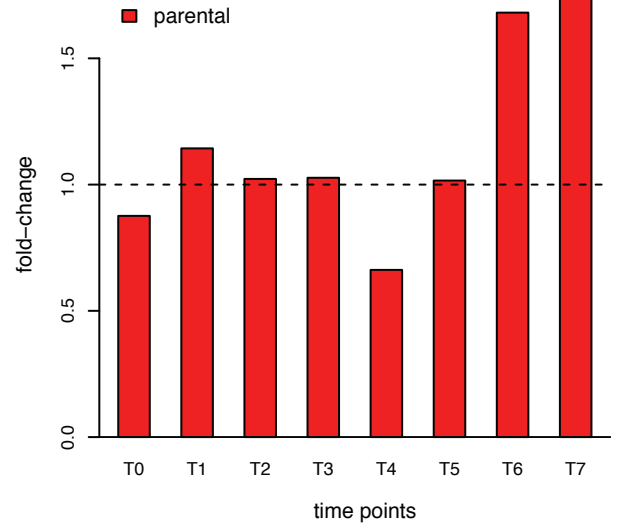

CAL-33 SP (#303)

ERVMER34-1

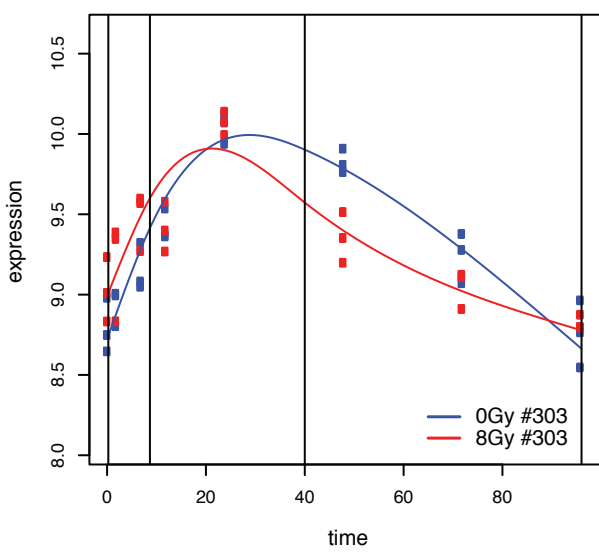

ERVMER34-1

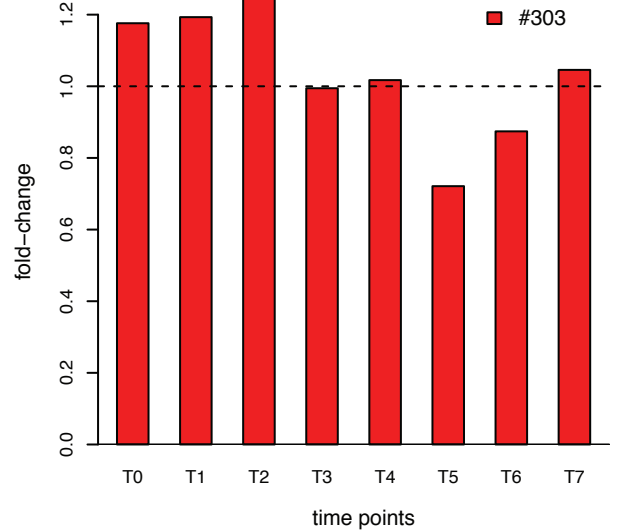

CAL-33 RP (#327)

ERVMER34-1

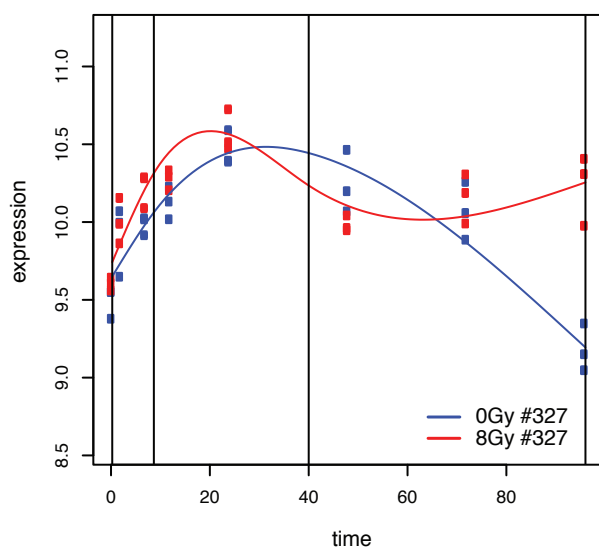

ERVMER34-1

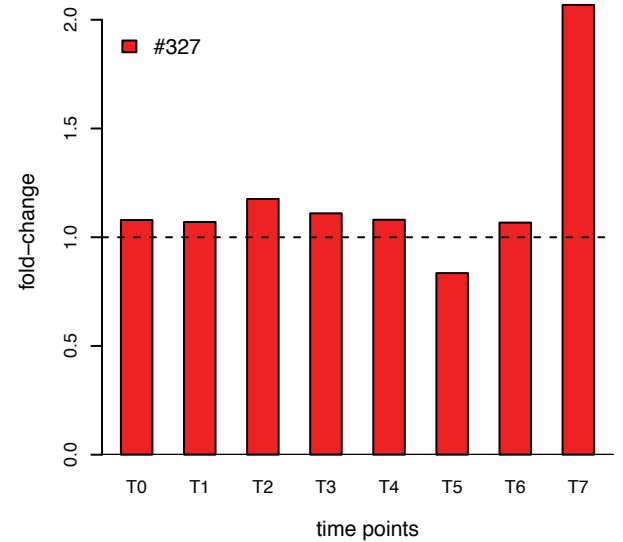

Supplement: MOESM12 [file 10521202]
